# Supplementary material
Source: publisher figshare collection journal article supplement (https://sage.figshare.com/ndownloader/files/18514166)
Supplement: Supplementary file 1 [file 18514166]

| **Guideline for interviews with professional care givers.** |
| --- |
| **General questions** |
| - Would you please briefly describe what constitutes pediatric palliative care in your opinion? - Which aspects regarding pediatric palliative care are most important to you? - What are your demands regarding pediatric palliative care? |
| **Questions regarding the child** |
| - What can pediatric palliative care do for children?   - How can it help children? - In your opinion, which aspects regarding the child must be addressed by pediatric palliative care? - What kind of change in the child’s life are you hoping to be able to achieve as a professional care giver? - Looking back at the last 5 patients you cared for…   …what was of particular importance to you?  …what went well? What could have gone more smoothly? |
| Questions regarding the parents/care giver and other family members |
| - How can pediatric palliative care help/support parents/care givers? - In your opinion, what are the parents’/care givers’ most important needs? - What do you hope to be able to influence/change for the patient and his/her family? - In your opinion, how does the family benefit from receiving palliative care? - Looking back at the last 5 families you cared for…   …what was of particular importance to you?  …what went well? What could have gone more smoothly? |
| Questions regarding the involved staff |
| - In your opinion, what specific responsibility do staff members have regarding the children they care for? - In your opinion, what specific responsibility do staff members have regarding the families they care for? - What do you consider a successful interaction with the families? - Where do you see challenges in your work?   - Regarding the patients/families?   - Regarding the given structures within palliative care? |
| **Summary** |
| - Do you have any suggestions for improvement for pediatric palliative care? - Do you want to add anything that is important to you regarding this topic but has not yet been addressed? |
| *Note.* First-order bullet points represent the main questions. Second-order bullet points represent optional follow-up questions. |
